# Supplementary material for: Anthropogenic Influence on the Antarctic Mesospheric Cooling Observed during the Southern Hemisphere Minor Sudden Stratospheric Warming
Source: MDPI journal article supplement (doi:10.3390/atmos13091475), 2022-09-11
Supplement: s1 [file s1]

Archive with 1 entries (1 files):
- atmosphere-1904701-supplementary.pdf
