# Supplementary material for: Anthropogenic Influence on the Antarctic Mesospheric Cooling Observed during the Southern Hemisphere Minor Sudden Stratospheric Warming
Source: MDPI journal article supplement (doi:10.3390/atmos13091475), 2022-09-11
Supplement: s1 [file s1 › atmosphere-1904701-supplementary.pdf]

## Supplementary Materials:

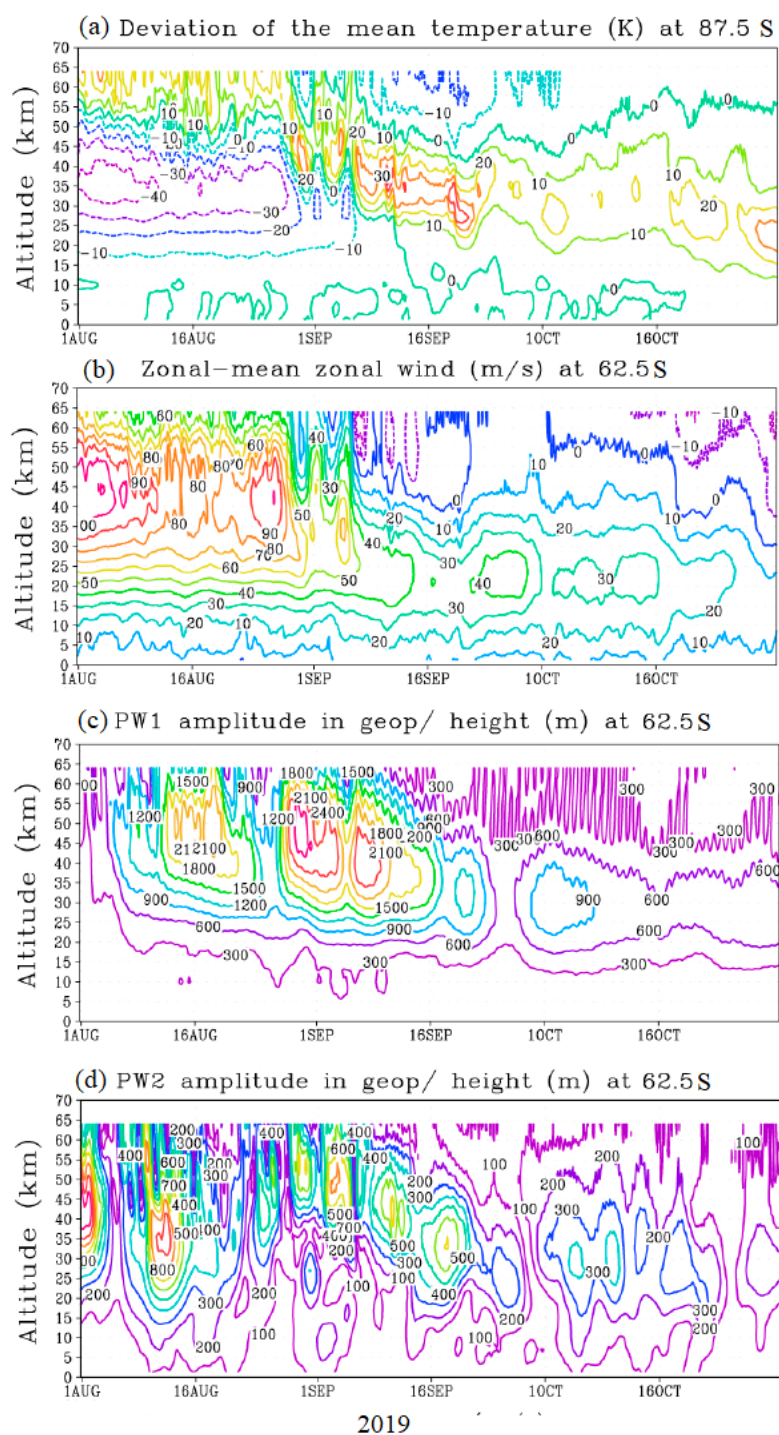

**Figure S1.** Day-altitude contour of the daily (a) zonal mean temperature deviation (anomalies), (b) zonal mean zonal wind, (c) planetary wave1, and (d) wave2 amplitudes observed in the geopotential heights. All the observations are from August to October 2019. The MERRA data has been used to generate this figure.
